# Supplementary material for: The copper sulfate hydration cycle. Crystal structures of CuSO4 (Chalcocyanite), CuSO4·H2O (Poitevinite), CuSO4·3H2O (Bonattite) and CuSO4·5H2O (Chalcanthite) at low temperature using non-spherical atomic scattering factors
Source: Royal Society of Chemistry journal article supplement (doi:10.1039/d2nj00169a), 2022-01-01
Supplement: d2nj00169a2.pdf [file d2nj00169a2.pdf]

# The copper sulfate hydration cycle. Crystal structures of $\text{CuSO}_4$ (Chalcocyanite), $\text{CuSO}_4 \cdot \text{H}_2\text{O}$ (Poitevinite), $\text{CuSO}_4 \cdot 3\text{H}_2\text{O}$ (Bonattite) and $\text{CuSO}_4 \cdot 5\text{H}_2\text{O}$ (Chalcanthite) at low temperature using non-spherical atomic scattering factors<sup>†</sup>

Mukaila A. Ibrahim and René T. Boeré\*

## Supplementary Information

| <u>Table of Contents</u>                                                                           | <u>Page No.</u> |
|----------------------------------------------------------------------------------------------------|-----------------|
| 1. Additional notes on sample preparation and handling                                             | S2              |
| 2. Electronic Crystal Structure Models                                                             | S5              |
| 3. Crystal, experimental and experimental data for $\text{CuSO}_4$ , <b>1</b>                      | S6              |
| 4. Crystal, experimental and derived data for $\text{CuSO}_4 \cdot \text{H}_2\text{O}$ , <b>2</b>  | S7              |
| 5. Crystal, experimental and derived data for $\text{CuSO}_4 \cdot 3\text{H}_2\text{O}$ , <b>3</b> | S12             |
| 6. Crystal, experimental and derived data for $\text{CuSO}_4 \cdot 5\text{H}_2\text{O}$ , <b>4</b> | S15             |
| 7. References for the Supporting Information                                                       | S19             |

---

<sup>a</sup> Department of Chemistry and Biochemistry, University of Lethbridge, Lethbridge, AB Canada.

<sup>b</sup> The Canadian Centre for Research in Advanced Fluorine Technologies (C-CRAFT), University of Lethbridge, Lethbridge, AB Canada.

## 1. Additional notes on sample preparation and handling

### Dehydration of $\text{CuSO}_4 \cdot 5\text{H}_2\text{O}$

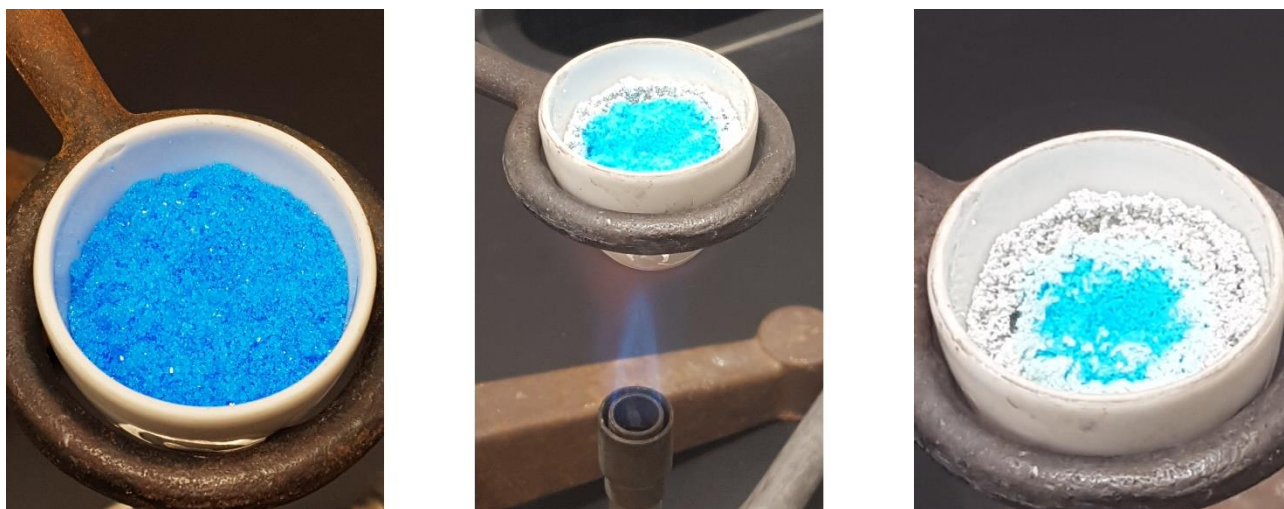

**Figure S1.** A popular demonstration of dehydration. The blue pentahydrate (at left) on heating with an open flame (center) visibly loses water as steam and the core shows progressively paler blue towards the edge (right), which is commonly described as the anhydrous sulfate.

Whilst heating bulk pentahydrate with an open flame is an attractive illustration of the facile dehydration of copper(II) sulfate, this procedure is not recommended for preparation of pure anhydrous  $\text{CuSO}_4$  since the temperature is difficult to control and decomposition of the sulfate ions into corrosive  $\text{SO}_3(\text{g})$ , leaving behind  $\text{CuO}(\text{s})$  can occur. CAUTION: FUME HOOD USE IS ESSENTIAL! In many versions of the ‘sequence of reactions of copper’ experiments, the oxide is of course the intended product. Merely heating the pentahydrate in a laboratory oven at  $120\text{--}150^\circ\text{C}$  produces a gray-white solid that is thought to be primarily  $\text{CuSO}_4 \cdot \text{H}_2\text{O}$ . Reliable dehydration to pure  $\text{CuSO}_4$  is best done by heating for several hours in a muffle furnace set to about  $350^\circ\text{C}$ .<sup>1</sup>

### Crystals of $\text{CuSO}_4 \cdot 5\text{H}_2\text{O}$ and $\text{CuSO}_4 \cdot 3\text{H}_2\text{O}$

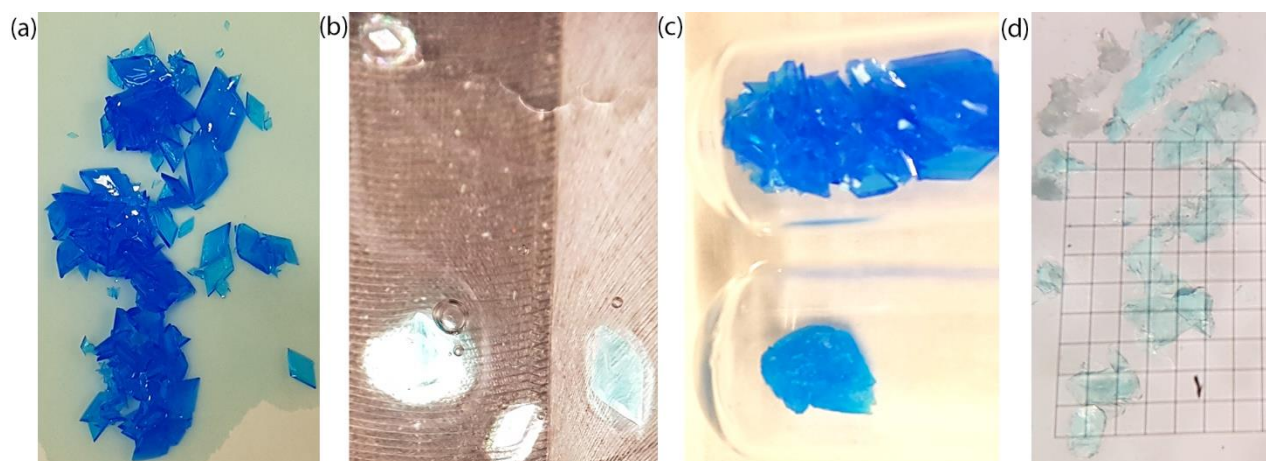

**Figure S2.** (a) Beautiful trapezoidal crystals of  $\text{CuSO}_4 \cdot 5\text{H}_2\text{O}$  from cooling of a saturated aqueous solution and (b) the very smallest crystals from the sample viewed under the microscope. (c) The upper vial are bulk crystals of freshly grown  $\text{CuSO}_4 \cdot 5\text{H}_2\text{O}$  whilst the bottom vial contains the  $\text{CuSO}_4 \cdot 3\text{H}_2\text{O}$  crystals as grown. (d) Crystals of  $\text{CuSO}_4 \cdot 3\text{H}_2\text{O}$  under the microscope on a white background to aid visualization.

$\text{CuSO}_4 \cdot 5\text{H}_2\text{O}$  (Fisher, technical grade) was recrystallized from a saturated aqueous solution to afford bright blue trapezoidal plates. The recrystallized material was used for all subsequent work. Several very small lozenge-shaped crystals also formed, which were used to obtain the crystal structure of **4**, after carefully

splitting these crystals multiple times to obtain a sufficiently small crystal. Buffering the crystals from shock within the Paratone<sup>®</sup> crystal mounting oil was essential to the cleaving process.

$\text{CuSO}_4 \cdot 3\text{H}_2\text{O}$  **3** was obtained using an understanding of the  $\text{CuO}/\text{SO}_3/\text{H}_2\text{O}$  phase diagram <sup>1</sup> following the method reported by Götz.<sup>2</sup> 0.80 g of  $\text{CuSO}_4 \cdot 5\text{H}_2\text{O}$  (8 wt.%) was dissolved in 3.7 g  $\text{H}_2\text{O}$  (37 wt.%) in a 20 mL Erlenmeyer flask and gently heated on a hot plate. To this was carefully added 5.5 g of 98%  $\text{H}_2\text{SO}_4$  (55 wt.%) so as not to boil the solution. CAUTION: ANHYDROUS  $\text{H}_2\text{SO}_4$  IS A STRONG DESSICANT AS WELL AS ACIDIC. PROPPER GLOVES AND EYE PROTECTION IS ESSENTIAL. ALL WORK SHOULD BE PERFORMED IN A FUME HOOD. The resulting pale blue solution was cooled slowly overnight by turning off the hot plate. In the morning, clumps of sky-blue crystals had formed, which were filtered off on a coarse fritted glass funnel, 0.27 g (34% yield). The smallest clumps were transferred to Paratone<sup>®</sup> crystal mounting oil where they presented as aggregated blocks of almost colourless crystals that could be separated with a razor blade to afford bona fide single crystals in the oil. One of these crystals was mounted on the diffractometer and identified as **3**.

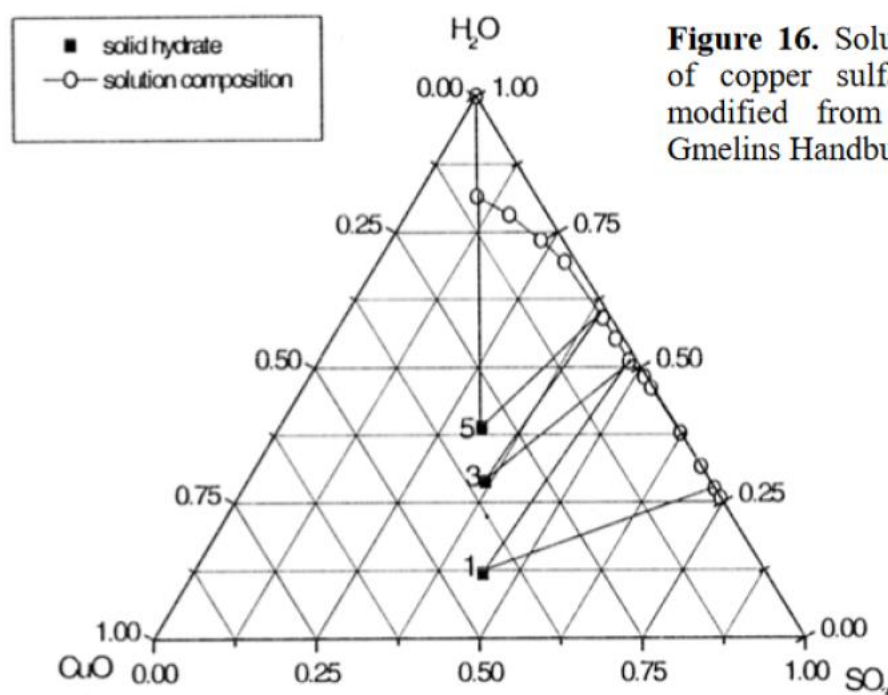

**Figure 16.** Solubility of the hydrates of copper sulfate in sulfuric acid; modified from Mellor (1923) and Gmelins Handbuch (1958).

**Figure S3.** The  $\text{CuO}/\text{SO}_3/\text{H}_2\text{O}$  phase diagram presented in Ref. 1.  $\text{CuSO}_4 \cdot 5\text{H}_2\text{O}$  covers a large field of stability so that the conditions for crystallization of  $\text{CuSO}_4 \cdot 3\text{H}_2\text{O}$  and  $\text{CuSO}_4 \cdot \text{H}_2\text{O}$  are quite restricted. (Used with permission from the Mineralogical Society of America: J. L. Jambor, D. K. Nordstrom, C. N. Alpers, *Rev. Mineral. Geochem.*, 2000, **40**, 303.)

The mother liquor from the synthesis of **3** described above was gently boiled on the hot plate for 3 h and concentrated to about  $\frac{3}{4}$  the original volume. On cooling overnight, clusters of palest blue crystals of **2** formed at the bottom, were filtered on the fritted funnel, transferred to a microscope slide and immersed in Paratone<sup>®</sup>. The crystals were readily identified as **2** from the unit cell parameters, but crystal quality was poor with excessively high  $R_{\text{int}}$  on intensities. Careful searching resulted in the identification of very small flat needles. These crystals were adequate but still not of excellent diffraction quality with strong evidence of some modulation. The smallest crystals, requiring the brighter  $\text{Cu K}\alpha$  source, gave the best results and one of these was used for the reported structure.

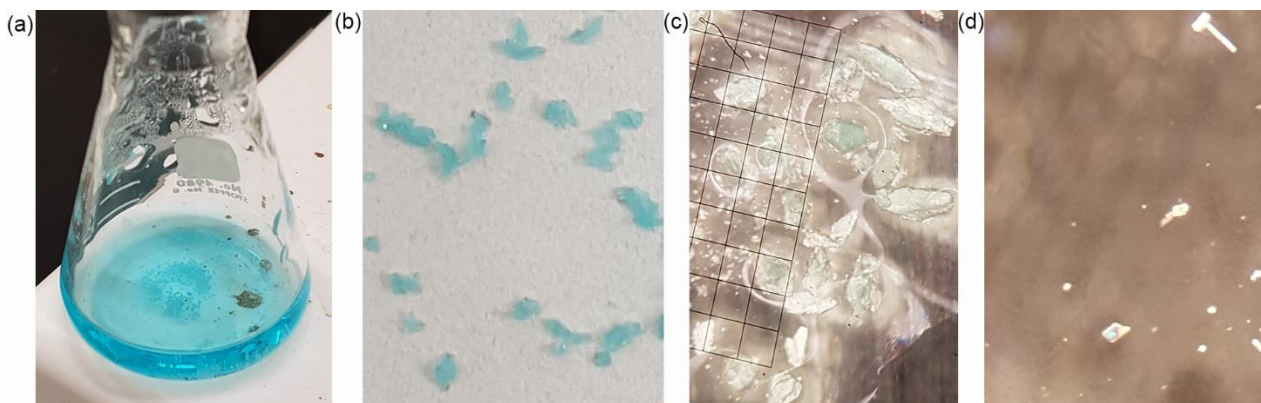

**Figure S4.** (a) Crystals of  $\text{CuSO}_4 \cdot \text{H}_2\text{O}$  have formed after cooling the concentrated solution. (b) Crystals after filtration. (c) Bulk crystals on the microscope that diffract poorly. (d) Very small flat needles of  $\text{CuSO}_4 \cdot \text{H}_2\text{O}$  such as that at top right of the image gave the best diffraction patterns.

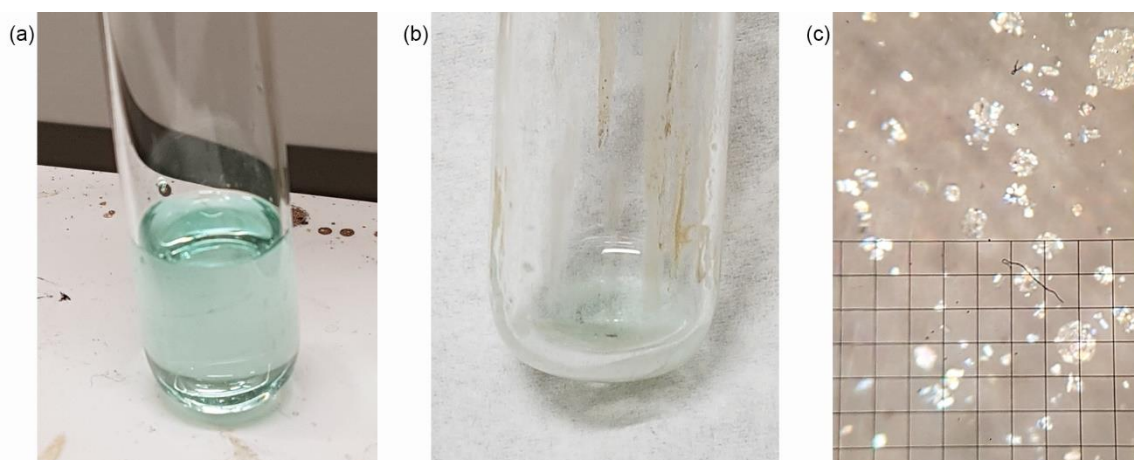

**Figure S5.** (a) Mother liquor for  $\text{CuSO}_4$  crystal growth (20%  $(\text{NH}_4)_2\text{SO}_4$ /80%  $\text{H}_2\text{SO}_4$ ). (b) Colourless precipitate after decanting the mother liquor. (c) Crystals of anhydrous  $\text{CuSO}_4$  under the microscope.

Crystals of anhydrous  $\text{CuSO}_4$  **1** were obtained following the method of Gruzensky.<sup>3</sup> 2.64 g  $(\text{NH}_4)_2\text{SO}_4$  was dissolved by heating with an open flame in 7.84 g of 98%  $\text{H}_2\text{SO}_4$  contained in a 20 mL borosilicate test tube and the mixture boiled for several minutes. CAUTION: ANHYDROUS  $\text{H}_2\text{SO}_4$  IS A STRONG DESSICANT AS WELL AS ACIDIC. PROPPER GLOVES AND EYE PROTECTION IS ESSENTIAL. ALL WORK SHOULD BE PERFORMED IN A FUME HOOD. Finely ground  $\text{CuSO}_4 \cdot 5\text{H}_2\text{O}$  was dehydrated in an oven at 130 °C for 3 H until grey/white in colour and added to the 20/80 mole fraction mixture until saturated at the boil. Slow cooling of the faintly blue solution was achieved by placing the end of the TT on a hot plate for several hours. Thereafter the heating was stopped, and the TT left undisturbed overnight. A fine precipitate of colourless crystals was obtained of which a portion were transferred to Paratone<sup>®</sup> crystal mounting oil. Suitable uniformly shaped prisms were selected under the microscope, mounted, and identified as **1** by the unit cell parameters. Data was collected using Mo  $K\alpha$  radiation at 100 K.

## 2. Electronic Crystal Structure Models

1. CuSO4-UnitCell.mryx
2. CuSO4-CoordinationSphere
3. CuSO4.H2O-UnitCell.mryx
4. CuSO4.H2O-CoordinationSphere
5. CuSO4.3H2O-UnitCell.mryx
6. CuSO4.3H2O-UnitCell.mryx
7. CuSO4.5H2O-CoordinationSphere
8. CuSO4.5H2O-CoordinationSphere

Eight Mercury CSD .mryx (binary format) electronic structure model files are provided with the ESI in a ZIP archive, corresponding to the models presented in Figs. 1-5 of the paper. *Aspects of the appearance will depend on the current settings of your Mercury software, such as the Atom radii and Bond thickness, Atom colours and Label size. Whether or not H atoms are shown as displacement ellipsoids will depend on the Ellipsoid Settings... within the Display/Styles menu.*

Mercury CSD is available free of charge to the educational and research communities by the Cambridge Crystallographic Data Centre and can be downloaded from <https://www.ccdc.cam.ac.uk/support-and-resources/downloads/>. Mercury is of course able to read the CIF files directly, but for inorganic solids such as the copper(II) sulfates it takes some effort and advanced knowledge of the software to build the kinds of models displayed in our paper. These binary .mryx files preserve the models as built up by the authors. *This data is provided free, but explicitly without warranty or liability. Users of our provided models are responsible to learn the basics of the Mercury CSD software, which is well supported on the CCDC websites.*

### 3. Crystal, experimental and derived data for CuSO<sub>4</sub>, 1

**Table S1 Crystal data and structure refinement for CuSO<sub>4</sub>, 1.**

|                                             |                                                              |
|---------------------------------------------|--------------------------------------------------------------|
| Identification code                         | RB21097if                                                    |
| Empirical formula                           | CuO <sub>4</sub> S                                           |
| Formula weight                              | 159.609                                                      |
| Temperature/K                               | 100.0(3)                                                     |
| Crystal system                              | orthorhombic                                                 |
| Space group                                 | <i>Pnma</i>                                                  |
| a/Å                                         | 8.3958(6)                                                    |
| b/Å                                         | 6.6760(4)                                                    |
| c/Å                                         | 4.8270(3)                                                    |
| α/°                                         | 90                                                           |
| β/°                                         | 90                                                           |
| γ/°                                         | 90                                                           |
| Volume/Å <sup>3</sup>                       | 270.56(3)                                                    |
| Z                                           | 4                                                            |
| ρ <sub>calc</sub> /g/cm <sup>3</sup>        | 3.918                                                        |
| μ/mm <sup>-1</sup>                          | 8.637                                                        |
| F(000)                                      | 310.2                                                        |
| Crystal size/mm <sup>3</sup>                | 0.09 × 0.05 × 0.04                                           |
| Radiation                                   | Mo Kα (λ = 0.71073)                                          |
| 2θ range for data collection/°              | 9.72 to 76.18                                                |
| Index ranges                                | -13 ≤ h ≤ 14, -10 ≤ k ≤ 11, -7 ≤ l ≤ 8                       |
| Reflections collected                       | 3682                                                         |
| Independent reflections                     | 738 [R <sub>int</sub> = 0.0344, R <sub>sigma</sub> = 0.0251] |
| Data/restraints/parameters                  | 738/0/34                                                     |
| Goodness-of-fit on F <sup>2</sup>           | 1.022                                                        |
| Final R indexes [I >= 2σ (I)]               | R <sub>1</sub> = 0.0205, wR <sub>2</sub> = 0.0520            |
| Final R indexes [all data]                  | R <sub>1</sub> = 0.0235, wR <sub>2</sub> = 0.0535            |
| Largest diff. peak/hole / e Å <sup>-3</sup> | 0.61/-1.03                                                   |

**Table S2 Fractional Atomic Coordinates (×10<sup>4</sup>) and Equivalent Isotropic Displacement Parameters (Å<sup>2</sup>×10<sup>3</sup>) for CuSO<sub>4</sub>, 1. U<sub>eq</sub> is defined as 1/3 of the trace of the orthogonalised U<sub>ij</sub> tensor.**

| Atom | x          | y         | z          | U(eq)    |
|------|------------|-----------|------------|----------|
| Cu   | 0          | 0         | 0          | 3.64(7)  |
| S    | 1837.0(5)  | 2500      | 4515.5(8)  | 2.40(8)  |
| O1   | 1306.2(14) | 2500      | 7388(2)    | 5.2(2)   |
| O2   | 3642.1(14) | 2500      | 4379(3)    | 4.1(2)   |
| O3   | 1321.7(9)  | 666.9(12) | 3110.5(18) | 4.94(15) |

**Table S3 Anisotropic Displacement Parameters ( $\text{\AA}^2 \times 10^3$ ) for CuSO<sub>4</sub>, 1. The Anisotropic displacement factor exponent takes the form:  $-2\pi^2[h^2a^*U_{11}+2hka^*b^*U_{12}+\dots]$ .**

| Atom | U <sub>11</sub> | U <sub>22</sub> | U <sub>33</sub> | U <sub>12</sub> | U <sub>13</sub> | U <sub>23</sub> |
|------|-----------------|-----------------|-----------------|-----------------|-----------------|-----------------|
| Cu   | 3.60(12)        | 3.05(11)        | 4.26(11)        | 0.49(6)         | -1.28(6)        | -0.85(6)        |
| S    | 2.16(16)        | 2.41(15)        | 2.64(14)        | -0              | -0.13(12)       | 0               |
| O1   | 6.0(5)          | 5.5(4)          | 4.1(5)          | -0              | 1.4(4)          | 0               |
| O2   | 3.1(5)          | 2.9(4)          | 6.3(5)          | -0              | -0.1(4)         | 0               |
| O3   | 4.7(4)          | 3.8(3)          | 6.3(3)          | -0.2(3)         | -1.8(3)         | -0.9(3)         |

**Table S4 Bond Lengths for CuSO<sub>4</sub>, 1.**

| Atom Atom          | Length/\AA | Atom Atom         | Length/\AA |
|--------------------|------------|-------------------|------------|
| Cu O1 <sup>1</sup> | 2.3618(8)  | Cu O3             | 1.9194(8)  |
| Cu O1 <sup>2</sup> | 2.3618(8)  | S O1              | 1.4563(12) |
| Cu O2 <sup>3</sup> | 2.0433(7)  | S O2              | 1.5170(12) |
| Cu O2 <sup>4</sup> | 2.0433(7)  | S O3              | 1.4645(8)  |
| Cu O3 <sup>5</sup> | 1.9194(8)  | S O3 <sup>6</sup> | 1.4645(8)  |

<sup>1</sup>-X,-1/2+Y,1-Z; <sup>2</sup>+X,+Y,-1+Z; <sup>3</sup>-1/2+X,1/2-Y,1/2-Z; <sup>4</sup>1/2-X,-Y,-1/2+Z; <sup>5</sup>-X,-Y,-Z; <sup>6</sup>+X,1/2-Y,+Z

**Table S5 Bond Angles for CuSO<sub>4</sub>, 1.**

| Atom Atom Atom                     | Angle/°   | Atom Atom Atom                      | Angle/°   |
|------------------------------------|-----------|-------------------------------------|-----------|
| O1 <sup>1</sup> Cu O1 <sup>2</sup> | 180.0     | O3 <sup>5</sup> Cu O3               | 180.0     |
| O2 <sup>3</sup> Cu O1 <sup>2</sup> | 76.13(3)  | O2 S O1                             | 110.31(7) |
| O2 <sup>3</sup> Cu O1 <sup>1</sup> | 103.87(3) | O3 S O1                             | 110.52(4) |
| O2 <sup>4</sup> Cu O1 <sup>2</sup> | 103.87(3) | O3 <sup>6</sup> S O1                | 110.52(4) |
| O2 <sup>4</sup> Cu O1 <sup>1</sup> | 76.13(3)  | O3 <sup>6</sup> S O2                | 105.96(4) |
| O2 <sup>4</sup> Cu O2 <sup>3</sup> | 180.0     | O3 S O2                             | 105.96(4) |
| O3 Cu O1 <sup>1</sup>              | 90.84(4)  | O3 <sup>6</sup> S O3                | 113.36(7) |
| O3 Cu O1 <sup>2</sup>              | 89.16(4)  | Cu <sup>7</sup> O1 Cu <sup>8</sup>  | 89.93(4)  |
| O3 <sup>5</sup> Cu O1 <sup>1</sup> | 89.16(4)  | S O1 Cu <sup>8</sup>                | 130.57(3) |
| O3 <sup>5</sup> Cu O1 <sup>2</sup> | 90.84(4)  | S O1 Cu <sup>7</sup>                | 130.57(3) |
| O3 <sup>5</sup> Cu O2 <sup>3</sup> | 88.95(4)  | Cu <sup>9</sup> O2 Cu <sup>10</sup> | 109.53(5) |
| O3 Cu O2 <sup>3</sup>              | 91.05(4)  | S O2 Cu <sup>10</sup>               | 123.44(3) |
| O3 Cu O2 <sup>4</sup>              | 88.95(4)  | S O2 Cu <sup>9</sup>                | 123.44(3) |
| O3 <sup>5</sup> Cu O2 <sup>4</sup> | 91.05(4)  | S O3 Cu                             | 136.63(5) |

<sup>1</sup>-X,-1/2+Y,1-Z; <sup>2</sup>+X,+Y,-1+Z; <sup>3</sup>-1/2+X,1/2-Y,1/2-Z; <sup>4</sup>1/2-X,-Y,-1/2+Z; <sup>5</sup>-X,-Y,-Z; <sup>6</sup>+X,1/2-Y,+Z; <sup>7</sup>-X,1/2+Y,1-Z; <sup>8</sup>+X,+Y,1+Z; <sup>9</sup>1/2-X,-Y,1/2+Z; <sup>10</sup>1/2+X,1/2-Y,1/2-Z

**Table S6 Torsion Angles for CuSO<sub>4</sub>, 1.**

| A               | B  | C | D               | Angle/°    | A               | B  | C | D               | Angle/°    |
|-----------------|----|---|-----------------|------------|-----------------|----|---|-----------------|------------|
| Cu <sup>1</sup> | O1 | S | O2              | -111.52(7) | Cu <sup>5</sup> | O2 | S | O3              | -41.46(9)  |
| Cu <sup>2</sup> | O1 | S | O2              | 111.52(7)  | Cu <sup>4</sup> | O2 | S | O3              | 162.18(7)  |
| Cu <sup>1</sup> | O1 | S | O3 <sup>3</sup> | 131.63(7)  | Cu <sup>5</sup> | O2 | S | O3 <sup>3</sup> | -162.18(7) |
| Cu <sup>1</sup> | O1 | S | O3              | 5.32(9)    | Cu              | O3 | S | O1              | 119.13(8)  |
| Cu <sup>2</sup> | O1 | S | O3              | -131.63(7) | Cu <sup>6</sup> | O3 | S | O1              | 119.13(8)  |
| Cu <sup>2</sup> | O1 | S | O3 <sup>3</sup> | -5.32(9)   | Cu <sup>6</sup> | O3 | S | O2              | -121.37(8) |
| Cu <sup>4</sup> | O2 | S | O1              | -78.18(7)  | Cu              | O3 | S | O2              | -121.37(8) |
| Cu <sup>5</sup> | O2 | S | O1              | 78.18(7)   | Cu <sup>6</sup> | O3 | S | O3 <sup>3</sup> | -5.57(5)   |
| Cu <sup>4</sup> | O2 | S | O3 <sup>3</sup> | 41.46(9)   | Cu              | O3 | S | O3 <sup>3</sup> | -5.57(5)   |

<sup>1</sup>+X,+Y,1+Z; <sup>2</sup>-X,1/2+Y,1-Z; <sup>3</sup>+X,1/2-Y,+Z; <sup>4</sup>1/2+X,1/2-Y,1/2-Z; <sup>5</sup>1/2-X,-Y,1/2+Z; <sup>6</sup>-X,-Y,-Z

**Refinement model description**

Number of restraints - 0, number of constraints - 0.

Details:

1. Rigid body (RIGU) restraints

All non-hydrogen atoms

with sigma for 1-2 distances of 0.004 and sigma for 1-3 distances of 0.004



#### 4. Crystal, experimental and derived data for CuSO<sub>4</sub>·H<sub>2</sub>O, 2

**Table S7 Crystal data and structure refinement for CuSO<sub>4</sub>·H<sub>2</sub>O, 2.**

|                                             |                                                              |
|---------------------------------------------|--------------------------------------------------------------|
| Identification code                         | RB21080ai2f                                                  |
| Empirical formula                           | CuH <sub>2</sub> O <sub>5</sub> S                            |
| Formula weight                              | 177.625                                                      |
| Temperature/K                               | 100.01(10)                                                   |
| Crystal system                              | triclinic                                                    |
| Space group                                 | P-1                                                          |
| a/Å                                         | 5.0281(5)                                                    |
| b/Å                                         | 5.1502(5)                                                    |
| c/Å                                         | 7.5607(9)                                                    |
| α/°                                         | 108.592(12)                                                  |
| β/°                                         | 108.382(12)                                                  |
| γ/°                                         | 91.359(10)                                                   |
| Volume/Å <sup>3</sup>                       | 174.41(4)                                                    |
| Z                                           | 2                                                            |
| ρ <sub>calc</sub> /g/cm <sup>3</sup>        | 3.382                                                        |
| μ/mm <sup>-1</sup>                          | 13.717                                                       |
| F(000)                                      | 171.3                                                        |
| Crystal size/mm <sup>3</sup>                | 0.14 × 0.06 × 0.027                                          |
| Radiation                                   | Cu Kα (λ = 1.54184)                                          |
| 2θ range for data collection/°              | 13.14 to 160.66                                              |
| Index ranges                                | -6 ≤ h ≤ 6, -6 ≤ k ≤ 6, -9 ≤ l ≤ 9                           |
| Reflections collected                       | 3078                                                         |
| Independent reflections                     | 751 [R <sub>int</sub> = 0.0399, R <sub>sigma</sub> = 0.0243] |
| Data/restraints/parameters                  | 751/32/73                                                    |
| Goodness-of-fit on F <sup>2</sup>           | 1.037                                                        |
| Final R indexes [I ≥ 2σ (I)]                | R <sub>1</sub> = 0.0753, wR <sub>2</sub> = 0.2174            |
| Final R indexes [all data]                  | R <sub>1</sub> = 0.0759, wR <sub>2</sub> = 0.2178            |
| Largest diff. peak/hole / e Å <sup>-3</sup> | 2.49/-1.48                                                   |

**Table S8 Fractional Atomic Coordinates (×10<sup>4</sup>) and Equivalent Isotropic Displacement Parameters (Å<sup>2</sup>×10<sup>3</sup>) for CuSO<sub>4</sub>·H<sub>2</sub>O, 2. U<sub>eq</sub> is defined as 1/3 of the trace of the orthogonalised U<sub>ij</sub> tensor.**

| Atom | x        | y         | z        | U(eq)    |
|------|----------|-----------|----------|----------|
| Cu1  | 5000     | 5000      | 5000     | 11.6(6)  |
| Cu2  | 0        | 0         | 0        | 11.0(6)  |
| S1   | 3916(4)  | 10745(4)  | 7526(3)  | 10.6(6)  |
| O1   | 1374(14) | 4397(14)  | 2702(9)  | 12.9(13) |
| O2   | 3361(14) | 7703(13)  | 6711(10) | 14.0(13) |
| O3   | 7043(13) | 11635(13) | 8517(10) | 13.0(13) |
| O4   | 2528(14) | 11710(14) | 9026(10) | 14.2(13) |
| O5   | 2937(14) | 11969(14) | 5993(10) | 14.0(13) |

**Table S9 Anisotropic Displacement Parameters ( $\text{\AA}^2 \times 10^3$ ) for  $\text{CuSO}_4 \cdot \text{H}_2\text{O}$ , 2. The Anisotropic displacement factor exponent takes the form:  $-2\pi^2[h^2a^*2U_{11}+2hka^*b^*U_{12}+\dots]$ .**

| Atom | $U_{11}$ | $U_{22}$ | $U_{33}$ | $U_{12}$ | $U_{13}$ | $U_{23}$ |
|------|----------|----------|----------|----------|----------|----------|
| Cu1  | 13.8(10) | 11.7(10) | 7.3(9)   | 1.9(7)   | 0.9(7)   | 3.0(7)   |
| Cu2  | 13.7(10) | 11.3(10) | 6.2(9)   | 2.4(7)   | 0.6(7)   | 3.5(7)   |
| S1   | 13.6(11) | 9.2(10)  | 6.8(10)  | 1.5(7)   | 0.6(8)   | 2.4(8)   |
| O1   | 15(3)    | 15(3)    | 6(3)     | 3(2)     | 1(2)     | 3(2)     |
| O2   | 17(3)    | 11(3)    | 14(3)    | 3(2)     | 6(3)     | 3(3)     |
| O3   | 13.3(15) | 12.9(15) | 12.8(14) | 1.7(5)   | 4.3(5)   | 4.5(5)   |
| O4   | 14.6(15) | 13.9(15) | 13.9(14) | 1.8(5)   | 4.9(5)   | 4.5(5)   |
| O5   | 14.4(15) | 14.0(15) | 13.6(14) | 1.9(5)   | 4.6(5)   | 5.0(5)   |

**Table S10 Bond Lengths for  $\text{CuSO}_4 \cdot \text{H}_2\text{O}$ , 2.**

| Atom Atom           | Length/ $\text{\AA}$ | Atom Atom           | Length/ $\text{\AA}$ |
|---------------------|----------------------|---------------------|----------------------|
| Cu1 O1 <sup>1</sup> | 2.018 (6)            | Cu2 O3 <sup>1</sup> | 1.946 (6)            |
| Cu1 O1              | 2.018 (6)            | Cu2 O3 <sup>5</sup> | 1.946 (6)            |
| Cu1 O2              | 1.967 (6)            | Cu2 O4 <sup>6</sup> | 1.971 (6)            |
| Cu1 O2 <sup>1</sup> | 1.967 (6)            | Cu2 O4 <sup>7</sup> | 1.971 (6)            |
| Cu1 O5 <sup>2</sup> | 2.289 (6)            | S1 O2               | 1.472 (7)            |
| Cu1 O5 <sup>3</sup> | 2.289 (6)            | S1 O3               | 1.499 (7)            |
| Cu2 O1 <sup>4</sup> | 2.422 (7)            | S1 O4               | 1.476 (7)            |
| Cu2 O1              | 2.422 (7)            | S1 O5               | 1.450 (7)            |

<sup>1</sup>1-X,1-Y,1-Z; <sup>2</sup>1-X,2-Y,1-Z; <sup>3</sup>+X,-1+Y,+Z; <sup>4</sup>-X,-Y,-Z; <sup>5</sup>-1+X,-1+Y,-1+Z; <sup>6</sup>-X,1-Y,1-Z; <sup>7</sup>+X,-1+Y,-1+Z

**Table S11 Bond Angles for  $\text{CuSO}_4 \cdot \text{H}_2\text{O}$ , 2.**

| Atom Atom Atom                      | Angle/ $^\circ$ | Atom Atom Atom                      | Angle/ $^\circ$ |
|-------------------------------------|-----------------|-------------------------------------|-----------------|
| O1 <sup>1</sup> Cu1 O1              | 180.0           | O4 <sup>6</sup> Cu2 O1              | 83.0 (2)        |
| O2 Cu1 O1                           | 89.0 (3)        | O4 <sup>6</sup> Cu2 O1 <sup>4</sup> | 97.0 (2)        |
| O2 Cu1 O1 <sup>1</sup>              | 91.0 (3)        | O4 <sup>7</sup> Cu2 O1              | 97.0 (2)        |
| O2 <sup>1</sup> Cu1 O1              | 91.0 (3)        | O4 <sup>7</sup> Cu2 O1 <sup>4</sup> | 83.0 (2)        |
| O2 <sup>1</sup> Cu1 O1 <sup>1</sup> | 89.0 (3)        | O4 <sup>6</sup> Cu2 O3 <sup>5</sup> | 85.5 (3)        |
| O2 <sup>1</sup> Cu1 O2              | 180.0           | O4 <sup>7</sup> Cu2 O3 <sup>1</sup> | 85.5 (3)        |
| O5 <sup>2</sup> Cu1 O1              | 89.1 (2)        | O4 <sup>6</sup> Cu2 O3 <sup>1</sup> | 94.5 (3)        |
| O5 <sup>3</sup> Cu1 O1 <sup>1</sup> | 89.1 (2)        | O4 <sup>7</sup> Cu2 O3 <sup>5</sup> | 94.5 (3)        |
| O5 <sup>3</sup> Cu1 O1              | 90.9 (2)        | O4 <sup>7</sup> Cu2 O4 <sup>6</sup> | 180.0           |
| O5 <sup>2</sup> Cu1 O1 <sup>1</sup> | 90.9 (2)        | O3 S1 O2                            | 109.1 (4)       |
| O5 <sup>2</sup> Cu1 O2              | 82.5 (3)        | O4 S1 O2                            | 108.2 (4)       |
| O5 <sup>3</sup> Cu1 O2 <sup>1</sup> | 82.5 (3)        | O4 S1 O3                            | 108.8 (4)       |
| O5 <sup>3</sup> Cu1 O2              | 97.5 (3)        | O5 S1 O2                            | 112.1 (4)       |
| O5 <sup>2</sup> Cu1 O2 <sup>1</sup> | 97.5 (3)        | O5 S1 O3                            | 107.8 (4)       |
| O5 <sup>3</sup> Cu1 O5 <sup>2</sup> | 180.0           | O5 S1 O4                            | 110.9 (4)       |
| O1 <sup>4</sup> Cu2 O1              | 180.0           | Cu2 O1 Cu1                          | 119.4 (3)       |
| O3 <sup>1</sup> Cu2 O1              | 91.4 (2)        | S1 O2 Cu1                           | 130.9 (4)       |
| O3 <sup>1</sup> Cu2 O1 <sup>4</sup> | 88.6 (2)        | S1 O3 Cu2 <sup>1</sup>              | 131.6 (4)       |
| O3 <sup>5</sup> Cu2 O1              | 88.6 (2)        | S1 O4 Cu2 <sup>8</sup>              | 136.3 (4)       |
| O3 <sup>5</sup> Cu2 O1 <sup>4</sup> | 91.4 (2)        | S1 O5 Cu1 <sup>9</sup>              | 134.7 (4)       |
| O3 <sup>1</sup> Cu2 O3 <sup>5</sup> | 180.0           |                                     |                 |

<sup>1</sup>1-X,1-Y,1-Z; <sup>2</sup>+X,-1+Y,+Z; <sup>3</sup>1-X,2-Y,1-Z; <sup>4</sup>-X,-Y,-Z; <sup>5</sup>-1+X,-1+Y,-1+Z; <sup>6</sup>+X,-1+Y,-1+Z; <sup>7</sup>-X,1-Y,1-Z; <sup>8</sup>+X,1+Y,1+Z; <sup>9</sup>+X,1+Y,+Z

**Table S12 Hydrogen Bonds for CuSO<sub>4</sub>·H<sub>2</sub>O, 2.**

| D  | H   | A               | d(D-H)/Å  | d(H-A)/Å | d(D-A)/Å | D-H-A/° |
|----|-----|-----------------|-----------|----------|----------|---------|
| O1 | H1a | O3 <sup>1</sup> | 0.992(19) | 1.70(3)  | 2.692(9) | 173(14) |
| O1 | H1b | O2 <sup>2</sup> | 0.992(19) | 1.91(9)  | 2.808(9) | 150(14) |
| O1 | H1b | O5 <sup>3</sup> | 0.992(19) | 2.38(13) | 3.088(9) | 128(12) |

<sup>1</sup>1-X,2-Y,1-Z; <sup>2</sup>-X,1-Y,1-Z; <sup>3</sup>-X,2-Y,1-Z

**Table S13 Torsion Angles for CuSO<sub>4</sub>·H<sub>2</sub>O, 2.**

| A                | B  | C  | D  | Angle/°    | A                | B  | C  | D  | Angle/°    |
|------------------|----|----|----|------------|------------------|----|----|----|------------|
| Cu1              | O2 | S1 | O3 | -50.9 (6)  | Cu2 <sup>4</sup> | O3 | S1 | O2 | -34.5 (6)  |
| Cu1 <sup>1</sup> | O2 | S1 | O3 | -50.9 (6)  | Cu2 <sup>1</sup> | O3 | S1 | O2 | -34.5 (6)  |
| Cu1              | O2 | S1 | O4 | -169.0 (5) | Cu2 <sup>4</sup> | O3 | S1 | O4 | 83.2 (6)   |
| Cu1 <sup>1</sup> | O2 | S1 | O4 | -169.0 (5) | Cu2 <sup>1</sup> | O3 | S1 | O4 | 83.2 (6)   |
| Cu1              | O2 | S1 | O5 | 68.4 (6)   | Cu2 <sup>4</sup> | O3 | S1 | O5 | -156.4 (5) |
| Cu1 <sup>1</sup> | O2 | S1 | O5 | 68.4 (6)   | Cu2 <sup>1</sup> | O3 | S1 | O5 | -156.4 (5) |
| Cu1 <sup>2</sup> | O5 | S1 | O2 | -124.8 (5) | Cu2 <sup>5</sup> | O4 | S1 | O2 | -5.6 (7)   |
| Cu1 <sup>3</sup> | O5 | S1 | O2 | -124.8 (5) | Cu2 <sup>6</sup> | O4 | S1 | O2 | -5.6 (7)   |
| Cu1 <sup>2</sup> | O5 | S1 | O3 | -4.8 (6)   | Cu2 <sup>6</sup> | O4 | S1 | O3 | -123.9 (6) |
| Cu1 <sup>3</sup> | O5 | S1 | O3 | -4.8 (6)   | Cu2 <sup>5</sup> | O4 | S1 | O3 | -123.9 (6) |
| Cu1 <sup>2</sup> | O5 | S1 | O4 | 114.2 (6)  | Cu2 <sup>6</sup> | O4 | S1 | O5 | 117.8 (6)  |
| Cu1 <sup>3</sup> | O5 | S1 | O4 | 114.2 (6)  | Cu2 <sup>5</sup> | O4 | S1 | O5 | 117.8 (6)  |

<sup>1</sup>1-X,1-Y,1-Z; <sup>2</sup>+X,1+Y,+Z; <sup>3</sup>1-X,2-Y,1-Z; <sup>4</sup>1+X,1+Y,1+Z; <sup>5</sup>+X,1+Y,1+Z; <sup>6</sup>-X,1-Y,1-Z

**Table S14 Hydrogen Atom Coordinates (Å×10<sup>4</sup>) and Isotropic Displacement Parameters (Å<sup>2</sup>×10<sup>3</sup>) for CuSO<sub>4</sub>·H<sub>2</sub>O, 2.**

| Atom | x         | y         | z         | U(eq)    |
|------|-----------|-----------|-----------|----------|
| H1a  | 2100(300) | 5800(200) | 2300(200) | 15.5(16) |
| H1b  | -450(180) | 4300(300) | 2900(200) | 15.5(16) |

**Refinement model description**

Number of restraints - 8, number of constraints - 2.

Details:

1. Fixed Uiso

At 1.2 times of:

All O(H,H) groups

2. Restrained distances

O1-H1a = O1-H1b

0.989 with sigma of 0.02

3. Uiso/Uanis restraints and constraints

Uanis(O1) ≈ Ueq, Uanis(O2) ≈ Ueq, Uanis(O5) ≈ Ueq, Uanis(O3) ≈

Ueq, Uanis(O4) ≈ Ueq: with sigma of 0.05 and sigma for terminal atoms of 0.001

4. Rigid body (RIGU) restrains

S1, Cu2, Cu1

with sigma for 1-2 distances of 0.004 and sigma for 1-3 distances of 0.004

## 5. Crystal, experimental and derived data for CuSO<sub>4</sub>·3H<sub>2</sub>O, 3

**Table S15 Crystal data and structure refinement for CuSO<sub>4</sub>·3H<sub>2</sub>O, 3.**

|                                             |                                                               |
|---------------------------------------------|---------------------------------------------------------------|
| Identification code                         | RB21092_auto                                                  |
| Empirical formula                           | CuH <sub>6</sub> O <sub>7</sub> S                             |
| Formula weight                              | 213.655                                                       |
| Temperature/K                               | 100.01(10)                                                    |
| Crystal system                              | monoclinic                                                    |
| Space group                                 | Cc                                                            |
| a/Å                                         | 5.5708(2)                                                     |
| b/Å                                         | 12.9751(4)                                                    |
| c/Å                                         | 7.3754(2)                                                     |
| α/°                                         | 90                                                            |
| β/°                                         | 96.450(3)                                                     |
| γ/°                                         | 90                                                            |
| Volume/Å <sup>3</sup>                       | 529.73(3)                                                     |
| Z                                           | 4                                                             |
| ρ <sub>calc</sub> /g/cm <sup>3</sup>        | 2.679                                                         |
| μ/mm <sup>-1</sup>                          | 4.488                                                         |
| F(000)                                      | 430.3                                                         |
| Crystal size/mm <sup>3</sup>                | 0.101 × 0.07 × 0.057                                          |
| Radiation                                   | Mo Kα (λ = 0.71073)                                           |
| 2θ range for data collection/°              | 6.28 to 76.32                                                 |
| Index ranges                                | -9 ≤ h ≤ 9, -22 ≤ k ≤ 21, -12 ≤ l ≤ 12                        |
| Reflections collected                       | 13522                                                         |
| Independent reflections                     | 2761 [R <sub>int</sub> = 0.0375, R <sub>sigma</sub> = 0.0284] |
| Data/restraints/parameters                  | 2761/128/136                                                  |
| Goodness-of-fit on F <sup>2</sup>           | 1.012                                                         |
| Final R indexes [I ≥ 2σ (I)]                | R <sub>1</sub> = 0.0188, wR <sub>2</sub> = 0.0424             |
| Final R indexes [all data]                  | R <sub>1</sub> = 0.0194, wR <sub>2</sub> = 0.0429             |
| Largest diff. peak/hole / e Å <sup>-3</sup> | 0.39/-0.81                                                    |
| Flack parameter                             | 0.001(4)                                                      |

**Table S16 Fractional Atomic Coordinates (×10<sup>4</sup>) and Equivalent Isotropic Displacement Parameters (Å<sup>2</sup>×10<sup>3</sup>) for CuSO<sub>4</sub>·3H<sub>2</sub>O, 3. U<sub>eq</sub> is defined as 1/3 of the trace of the orthogonalised U<sub>ij</sub> tensor.**

| Atom | x          | y           | z           | U(eq)    |
|------|------------|-------------|-------------|----------|
| Cu1  | 4126.6(2)  | 6350.78(10) | 3506.72(18) | 4.53(3)  |
| O1   | 5735.4(17) | 6649.9(8)   | 5947.2(12)  | 7.28(16) |
| O2   | 8911.4(16) | 5543.8(8)   | 7319.4(13)  | 9.08(16) |
| O3   | 4938.2(16) | 5439.3(7)   | 8329.3(13)  | 8.07(15) |
| O4   | 7380.5(17) | 6957.9(8)   | 9010.0(12)  | 7.74(15) |
| O5   | 6995.4(16) | 6943.2(8)   | 2605.1(12)  | 7.90(15) |
| O6   | 2462.9(19) | 6286.0(7)   | 989.4(15)   | 7.58(17) |
| O7   | 1063.0(16) | 5905.3(8)   | 4330.1(12)  | 6.98(15) |
| S1   | 6750.1(5)  | 6129.7(2)   | 7672.3(4)   | 3.84(5)  |

**Table S17 Anisotropic Displacement Parameters ( $\text{\AA}^2 \times 10^3$ ) for  $\text{CuSO}_4 \cdot 3\text{H}_2\text{O}$ , **3**. The anisotropic displacement factor exponent takes the form:  $-2\pi^2[h^2a^*{}^2U_{11}+2hka^*b^*U_{12}+\dots]$ .**

| Atom | $U_{11}$ | $U_{22}$ | $U_{33}$ | $U_{12}$ | $U_{13}$ | $U_{23}$ |
|------|----------|----------|----------|----------|----------|----------|
| Cu1  | 4.04(5)  | 6.13(6)  | 3.44(5)  | -0.82(5) | 0.50(4)  | 0.03(5)  |
| O1   | 8.8(4)   | 7.7(4)   | 5.0(4)   | 0.8(3)   | -1.0(3)  | 0.7(3)   |
| O2   | 7.9(3)   | 10.8(4)  | 9.1(4)   | 4.9(3)   | 3.6(3)   | 3.2(3)   |
| O3   | 9.0(3)   | 6.6(3)   | 9.1(4)   | -2.2(3)  | 3.4(3)   | 0.1(3)   |
| O4   | 10.7(4)  | 7.1(4)   | 5.2(3)   | -1.9(3)  | 0.2(3)   | -1.5(3)  |
| O5   | 6.6(3)   | 10.0(4)  | 7.4(4)   | -0.7(3)  | 2.1(3)   | 0.8(3)   |
| H5a  | 12(9)    | 46(18)   | 11(4)    | -2(6)    | 2.6(19)  | 1(2)     |
| H5b  | 7(5)     | 15(13)   | 15(7)    | 0(3)     | 0(2)     | 0(5)     |
| O6   | 7.8(4)   | 9.5(4)   | 5.4(4)   | -0.1(3)  | 0.4(3)   | -0.0(3)  |
| H6a  | 11(8)    | 23(10)   | 5(5)     | 5(4)     | -2(3)    | 0(3)     |
| H6b  | 14(11)   | 18(6)    | 22(9)    | 6(4)     | 1(4)     | 5(3)     |
| O7   | 6.8(3)   | 7.8(4)   | 6.5(3)   | -1.2(3)  | 1.5(3)   | -0.2(3)  |
| H7a  | 13(10)   | 11(7)    | 15(8)    | -3(4)    | 3(4)     | -2(4)    |
| H7b  | 34(11)   | 26(11)   | 13(4)    | -12(5)   | 11(2)    | -4(2)    |
| S1   | 4.19(10) | 4.0(1)   | 3.38(10) | 0.05(8)  | 0.65(8)  | 0.05(8)  |

**Table S18 Bond Lengths for  $\text{CuSO}_4 \cdot 3\text{H}_2\text{O}$ , **3**.**

| Atom | Atom            | Length/ $\text{\AA}$ | Atom | Atom | Length/ $\text{\AA}$ |
|------|-----------------|----------------------|------|------|----------------------|
| Cu1  | O1              | 1.9574(9)            | O1   | S1   | 1.4941(10)           |
| Cu1  | O3 <sup>1</sup> | 2.3726(10)           | O2   | S1   | 1.4717(10)           |
| Cu1  | O5              | 1.9560(9)            | O3   | S1   | 1.4717(10)           |
| Cu1  | O6              | 1.9816(11)           | O4   | S1   | 1.4743(10)           |
| Cu1  | O7              | 1.9618(9)            | Cu1  | O4   | 2.4460(10)           |

<sup>1</sup>+X,1-Y,-1/2+Z

**Table S19 Bond Angles for  $\text{CuSO}_4 \cdot 3\text{H}_2\text{O}$ , **3**.**

| Atom            | Atom | Atom            | Angle/ $^\circ$ | Atom | Atom | Atom             | Angle/ $^\circ$ |
|-----------------|------|-----------------|-----------------|------|------|------------------|-----------------|
| O3 <sup>1</sup> | Cu1  | O1              | 100.05(4)       | O7   | Cu1  | O6               | 86.90(4)        |
| O5              | Cu1  | O1              | 85.84(4)        | S1   | O1   | Cu1              | 141.61(7)       |
| O5              | Cu1  | O3 <sup>1</sup> | 101.41(4)       | S1   | O3   | Cu1 <sup>2</sup> | 139.11(6)       |
| O6              | Cu1  | O1              | 170.99(4)       | O2   | S1   | O1               | 108.76(6)       |
| O6              | Cu1  | O3 <sup>1</sup> | 88.78(4)        | O3   | S1   | O1               | 110.34(6)       |
| O6              | Cu1  | O5              | 90.70(4)        | O3   | S1   | O2               | 110.41(6)       |
| O7              | Cu1  | O1              | 95.63(4)        | O4   | S1   | O1               | 106.23(6)       |
| O7              | Cu1  | O3 <sup>1</sup> | 84.63(4)        | O4   | S1   | O2               | 110.90(6)       |
| O7              | Cu1  | O5              | 173.46(4)       | O4   | S1   | O3               | 110.12(6)       |

<sup>1</sup>+X,1-Y,-1/2+Z; <sup>2</sup>+X,1-Y,1/2+Z

**Table S20 Hydrogen Bonds for CuSO<sub>4</sub>·3H<sub>2</sub>O, 3.**

| D  | H   | A               | d(D-H)/Å  | d(H-A)/Å  | d(D-A)/Å   | D-H-A/° |
|----|-----|-----------------|-----------|-----------|------------|---------|
| O5 | H5a | O4 <sup>1</sup> | 0.998(15) | 1.687(16) | 2.6841(13) | 178(3)  |
| O5 | H5b | O7 <sup>2</sup> | 1.001(15) | 1.890(19) | 2.8141(13) | 152(2)  |
| O6 | H6a | O3 <sup>1</sup> | 0.978(15) | 1.776(16) | 2.7505(14) | 174(2)  |
| O6 | H6b | O1 <sup>3</sup> | 0.993(16) | 1.94(2)   | 2.8448(15) | 151(2)  |
| O6 | H6b | O4 <sup>4</sup> | 0.993(16) | 2.48(2)   | 3.1589(15) | 125(2)  |
| O7 | H7a | O2 <sup>5</sup> | 1.000(15) | 1.621(16) | 2.6022(13) | 166(2)  |
| O7 | H7b | O2 <sup>6</sup> | 0.954(16) | 1.78(2)   | 2.6667(13) | 153(3)  |

<sup>1</sup>+X,+Y,-1+Z; <sup>2</sup>1+X,+Y,+Z; <sup>3</sup>-1/2+X,3/2-Y,-1/2+Z; <sup>4</sup>-1+X,+Y,-1+Z; <sup>5</sup>-1+X,1-Y,-1/2+Z; <sup>6</sup>-1+X,+Y,+Z

**Table S21 Torsion Angles for CuSO<sub>4</sub>·3H<sub>2</sub>O, 3.**

| A   | B  | C  | D  | Angle/°     | A                | B  | C  | D  | Angle/°    |
|-----|----|----|----|-------------|------------------|----|----|----|------------|
| Cu1 | O1 | S1 | O2 | 68.25(11)   | Cu1 <sup>1</sup> | O3 | S1 | O1 | 106.11(9)  |
| Cu1 | O1 | S1 | O3 | -53.00(11)  | Cu1 <sup>1</sup> | O3 | S1 | O2 | -14.15(10) |
| Cu1 | O1 | S1 | O4 | -172.33(10) | Cu1 <sup>1</sup> | O3 | S1 | O4 | -136.94(8) |

<sup>1</sup>+X,1-Y,1/2+Z

**Table S22 Hydrogen Atom Coordinates (Å×10<sup>4</sup>) and Isotropic Displacement Parameters (Å<sup>2</sup>×10<sup>3</sup>) for CuSO<sub>4</sub>·3H<sub>2</sub>O, 3.**

| Atom | x        | y        | z        | U(eq) |
|------|----------|----------|----------|-------|
| H5a  | 7120(50) | 6930(30) | 1270(20) | 23(6) |
| H5b  | 8500(30) | 6790(20) | 3430(30) | 12(5) |
| H6a  | 3360(40) | 6030(20) | 20(30)   | 13(5) |
| H6b  | 1560(50) | 6920(16) | 590(40)  | 18(5) |
| H7a  | 400(40)  | 5273(15) | 3680(30) | 13(5) |
| H7b  | 720(60)  | 5880(20) | 5570(20) | 24(5) |

**Refinement model description**

Number of restraints - 128, number of constraints - 0.

Details:

## 1. Restrained distances

O6-H6b = O6-H6a = O5-H5a = O5-H5b = O7-H7b = O7-H7a  
0.989 with sigma of 0.02

## 2. Uiso/Uanis restraints and constraints

Uanis(H7b) ≈ Ueq, Uanis(H6a) ≈ Ueq: with sigma of 0.01 and sigma for terminal atoms of 0.02

## 3. Rigid body (RIGU) restrains

Cu1, O1, O1, O1, O2, O2, O2, O3, O3, O3, O4, O4, O4, O5, H5a, H5b, O6, H6a, H6b, O7, H7a, H7b, S1, S1, S1

with sigma for 1-2 distances of 0.004 and sigma for 1-3 distances of 0.004

H7b, H6b, H5b, H5a

with sigma for 1-2 distances of 0.001 and sigma for 1-3 distances of 0.001

## 5. Crystal, experimental and derived data for $\text{CuSO}_4 \cdot 5\text{H}_2\text{O}$ , 4

**Table S23 Crystal data and structure refinement for  $\text{CuSO}_4 \cdot 5\text{H}_2\text{O}$ , 4.**

|                                                |                                                                  |
|------------------------------------------------|------------------------------------------------------------------|
| Identification code                            | RB21086i                                                         |
| Empirical formula                              | $\text{CuH}_{10}\text{O}_9\text{S}$                              |
| Formula weight                                 | 249.686                                                          |
| Temperature/K                                  | 100.00(10)                                                       |
| Crystal system                                 | triclinic                                                        |
| Space group                                    | P-1                                                              |
| a/Å                                            | 5.9676(2)                                                        |
| b/Å                                            | 6.0957(2)                                                        |
| c/Å                                            | 10.6366(3)                                                       |
| $\alpha/^\circ$                                | 77.224(3)                                                        |
| $\beta/^\circ$                                 | 82.387(2)                                                        |
| $\gamma/^\circ$                                | 72.434(3)                                                        |
| Volume/Å <sup>3</sup>                          | 358.85(2)                                                        |
| Z                                              | 2                                                                |
| $\rho_{\text{calc}}/\text{g}/\text{cm}^3$      | 2.311                                                            |
| $\mu/\text{mm}^{-1}$                           | 3.350                                                            |
| F(000)                                         | 255.2                                                            |
| Crystal size/mm <sup>3</sup>                   | 0.222 × 0.173 × 0.135                                            |
| Radiation                                      | Mo K $\alpha$ ( $\lambda = 0.71073$ )                            |
| 2 $\theta$ range for data collection/ $^\circ$ | 7.14 to 76.6                                                     |
| Index ranges                                   | -10 ≤ h ≤ 10, -10 ≤ k ≤ 10, -17 ≤ l ≤ 18                         |
| Reflections collected                          | 18712                                                            |
| Independent reflections                        | 3729 [ $R_{\text{int}} = 0.0463$ , $R_{\text{sigma}} = 0.0349$ ] |
| Data/restraints/parameters                     | 3729/70/193                                                      |
| Goodness-of-fit on F <sup>2</sup>              | 1.076                                                            |
| Final R indexes [ $ I  \geq 2\sigma(I)$ ]      | $R_1 = 0.0249$ , $wR_2 = 0.0494$                                 |
| Final R indexes [all data]                     | $R_1 = 0.0290$ , $wR_2 = 0.0513$                                 |
| Largest diff. peak/hole / e Å <sup>-3</sup>    | 0.56/-0.63                                                       |

**Table S24 Fractional Atomic Coordinates ( $\times 10^4$ ) and Equivalent Isotropic Displacement Parameters ( $\text{\AA}^2 \times 10^3$ ) for  $\text{CuSO}_4 \cdot 5\text{H}_2\text{O}$ , 4.  $U_{\text{eq}}$  is defined as 1/3 of the trace of the orthogonalised  $U_{ij}$  tensor.**

| Atom | x           | y           | z         | U(eq)     |
|------|-------------|-------------|-----------|-----------|
| Cu1  | 5000        | 5000        | 5000      | 5.32(4)   |
| S1   | 8739.4(4)   | 5141.7(4)   | 2142.9(2) | 4.58(4)   |
| O1   | 3510.3(14)  | 3149.7(13)  | 4255.9(7) | 8.92(13)  |
| Cu2  | 5000        | 10000       | 0         | 5.07(4)   |
| O2   | 6529.8(13)  | 2087.5(13)  | 6181.7(7) | 8.62(13)  |
| O3   | 7972.9(14)  | 10343.1(14) | -952.3(8) | 12.10(15) |
| O4   | 5200.5(14)  | 7412.1(14)  | -826.9(8) | 13.19(15) |
| O6   | 8253.3(13)  | 4049.0(13)  | 3494.0(7) | 8.21(13)  |
| O7   | 8623.8(13)  | 3628.9(13)  | 1259.0(7) | 8.64(13)  |
| O8   | 11157.9(12) | 5434.0(13)  | 1999.8(7) | 7.53(12)  |
| O9   | 7030.3(13)  | 7481.0(12)  | 1833.6(7) | 8.52(13)  |
| O5   | 1312.5(14)  | 663.8(13)   | 6250.9(8) | 9.82(13)  |

**Table S25 Anisotropic Displacement Parameters ( $\text{\AA}^2 \times 10^3$ ) for  $\text{CuSO}_4 \cdot 5\text{H}_2\text{O}$ , 4. The Anisotropic displacement factor exponent takes the form:  $-2\pi^2[h^2a^*U_{11}+2hka^*b^*U_{12}+\dots]$ .**

| Atom | $U_{11}$ | $U_{22}$ | $U_{33}$ | $U_{12}$ | $U_{13}$ | $U_{23}$ |
|------|----------|----------|----------|----------|----------|----------|
| Cu1  | 5.53(7)  | 5.20(7)  | 5.53(7)  | -1.73(5) | -0.63(5) | -1.23(5) |
| S1   | 4.37(9)  | 4.18(9)  | 5.22(9)  | -1.19(7) | 0.30(7)  | -1.37(7) |
| O1   | 9.9(3)   | 9.5(3)   | 8.9(3)   | -4.5(3)  | -1.5(3)  | -1.8(2)  |
| H1a  | 24(8)    | 27(8)    | 24(8)    | -6(4)    | -1(4)    | -9(4)    |
| H1b  | 20(8)    | 18(8)    | 25(8)    | -8(4)    | 5(4)     | -3(4)    |
| Cu2  | 4.87(7)  | 4.74(7)  | 6.26(7)  | -2.19(5) | 1.39(5)  | -2.29(5) |
| O2   | 9.0(3)   | 8.3(3)   | 8.0(3)   | -2.2(3)  | -0.8(2)  | -0.5(2)  |
| H2a  | 20(6)    | 19(6)    | 19(6)    | -6(2)    | 1(2)     | -3(2)    |
| H2b  | 23(6)    | 20(6)    | 15(6)    | -6(2)    | -1(2)    | -4(2)    |
| O3   | 8.2(3)   | 8.0(3)   | 18.3(4)  | -2.3(3)  | 4.9(3)   | -2.3(3)  |
| H3a  | 33(8)    | 26(8)    | 16(8)    | -12(4)   | -1(4)    | -9(4)    |
| H3b  | 30(9)    | 25(8)    | 26(8)    | -5(4)    | -3(4)    | -8(4)    |
| O4   | 7.4(3)   | 12.5(4)  | 23.3(4)  | -2.7(3)  | 0.9(3)   | -12.3(3) |
| H4a  | 32(8)    | 27(8)    | 27(9)    | -8(4)    | -4(4)    | -2(4)    |
| H4b  | 26(8)    | 27(8)    | 34(9)    | -10(4)   | -2(4)    | -4(4)    |
| O6   | 9.7(3)   | 6.8(3)   | 7.0(3)   | -2.2(2)  | 1.3(2)   | -0.3(2)  |
| O7   | 7.9(3)   | 9.2(3)   | 10.4(3)  | -2.2(2)  | -1.1(2)  | -5.2(2)  |
| O8   | 6.1(3)   | 8.1(3)   | 9.5(3)   | -3.2(2)  | 0.4(2)   | -2.8(2)  |
| O9   | 8.8(3)   | 6.3(3)   | 7.9(3)   | 1.1(2)   | -0.5(2)  | -0.8(2)  |
| O5   | 10.1(3)  | 7.5(3)   | 11.7(3)  | -2.3(3)  | 0.1(3)   | -2.3(3)  |
| H5a  | 42(10)   | 45(9)    | 38(9)    | -12(5)   | -1(5)    | -7(5)    |
| H5b  | 34(9)    | 28(9)    | 36(9)    | -16(4)   | -3(5)    | -6(4)    |



**Table S26 Bond Lengths for CuSO<sub>4</sub>·5H<sub>2</sub>O, 4.**

| Atom | Atom            | Length/Å  | Atom | Atom            | Length/Å  |
|------|-----------------|-----------|------|-----------------|-----------|
| Cu1  | O1              | 1.9686(8) | S1   | O8              | 1.4910(7) |
| Cu1  | O1 <sup>1</sup> | 1.9686(8) | S1   | O9              | 1.4783(7) |
| Cu1  | O2              | 1.9759(7) | Cu2  | O3 <sup>2</sup> | 1.9676(7) |
| Cu1  | O2 <sup>1</sup> | 1.9759(7) | Cu2  | O3              | 1.9676(7) |
| Cu1  | O6 <sup>1</sup> | 2.3619(7) | Cu2  | O4              | 1.9360(8) |
| Cu1  | O6              | 2.3619(7) | Cu2  | O4 <sup>2</sup> | 1.9360(8) |
| S1   | O6              | 1.4751(7) | Cu2  | O9 <sup>2</sup> | 2.4100(7) |
| S1   | O7              | 1.4758(8) | Cu2  | O9              | 2.4100(7) |

<sup>1</sup>1-X,1-Y,1-Z; <sup>2</sup>1-X,2-Y,-Z**Table S27 Bond Angles for CuSO<sub>4</sub>·5H<sub>2</sub>O, 4.**

| Atom            | Atom | Atom            | Angle/°   | Atom            | Atom | Atom             | Angle/°   |
|-----------------|------|-----------------|-----------|-----------------|------|------------------|-----------|
| O1 <sup>1</sup> | Cu1  | O1              | 180.0     | O9              | S1   | O7               | 110.96(4) |
| O2              | Cu1  | O1              | 88.30(3)  | O9              | S1   | O8               | 108.65(4) |
| O2 <sup>1</sup> | Cu1  | O1              | 91.70(3)  | O3 <sup>2</sup> | Cu2  | O3               | 180.0     |
| O2 <sup>1</sup> | Cu1  | O1 <sup>1</sup> | 88.30(3)  | O4              | Cu2  | O3 <sup>2</sup>  | 90.39(3)  |
| O2              | Cu1  | O1 <sup>1</sup> | 91.70(3)  | O4 <sup>2</sup> | Cu2  | O3               | 90.39(3)  |
| O2              | Cu1  | O2 <sup>1</sup> | 180.0     | O4              | Cu2  | O3               | 89.61(3)  |
| O6 <sup>1</sup> | Cu1  | O1 <sup>1</sup> | 87.82(3)  | O4 <sup>2</sup> | Cu2  | O3 <sup>2</sup>  | 89.61(3)  |
| O6 <sup>1</sup> | Cu1  | O1              | 92.18(3)  | O4              | Cu2  | O4 <sup>2</sup>  | 180.0     |
| O6              | Cu1  | O1 <sup>1</sup> | 92.18(3)  | O9 <sup>2</sup> | Cu2  | O3 <sup>2</sup>  | 91.97(3)  |
| O6              | Cu1  | O1              | 87.82(3)  | O9              | Cu2  | O3               | 91.97(3)  |
| O6              | Cu1  | O2 <sup>1</sup> | 92.28(3)  | O9              | Cu2  | O3 <sup>2</sup>  | 88.03(3)  |
| O6 <sup>1</sup> | Cu1  | O2 <sup>1</sup> | 87.72(3)  | O9 <sup>2</sup> | Cu2  | O3               | 88.03(3)  |
| O6 <sup>1</sup> | Cu1  | O2              | 92.28(3)  | O9 <sup>2</sup> | Cu2  | O4               | 86.65(3)  |
| O6              | Cu1  | O2              | 87.72(3)  | O9              | Cu2  | O4               | 93.35(3)  |
| O6              | Cu1  | O6 <sup>1</sup> | 180.0     | O9 <sup>2</sup> | Cu2  | O4 <sup>2</sup>  | 93.35(3)  |
| O7              | S1   | O6              | 110.26(4) | O9              | Cu2  | O4 <sup>2</sup>  | 86.65(3)  |
| O8              | S1   | O6              | 108.62(4) | O9 <sup>2</sup> | Cu2  | O9               | 180.0     |
| O8              | S1   | O7              | 108.84(4) | S1              | O6   | Cu1 <sup>1</sup> | 132.10(4) |
| O9              | S1   | O6              | 109.46(4) | Cu2             | O9   | S1               | 138.36(4) |

<sup>1</sup>1-X,1-Y,1-Z; <sup>2</sup>1-X,2-Y,-Z**Table S28 Torsion Angles for CuSO<sub>4</sub>·5H<sub>2</sub>O, 4.**

| A                | B  | C  | D  | Angle/°    | A                | B  | C  | D  | Angle/°   |
|------------------|----|----|----|------------|------------------|----|----|----|-----------|
| Cu1 <sup>1</sup> | O6 | S1 | O7 | -108.98(6) | Cu1              | O6 | S1 | O8 | 131.84(6) |
| Cu1              | O6 | S1 | O7 | -108.98(6) | Cu1 <sup>1</sup> | O6 | S1 | O9 | 13.35(7)  |
| Cu1 <sup>1</sup> | O6 | S1 | O8 | 131.84(6)  | Cu1              | O6 | S1 | O9 | 13.35(7)  |

<sup>1</sup>1-X,1-Y,1-Z

**Table S29 Hydrogen Bonds for CuSO<sub>4</sub>·5H<sub>2</sub>O, 4.**

| D  | H   | A               | d(D-H)/Å  | d(H-A)/Å  | d(D-A)/Å   | D-H-A/°   |
|----|-----|-----------------|-----------|-----------|------------|-----------|
| O1 | H1a | O6 <sup>1</sup> | 0.962(14) | 2.494(17) | 3.1997(11) | 130.1(14) |
| O1 | H1a | O8 <sup>1</sup> | 0.962(14) | 1.875(15) | 2.8113(11) | 163.5(17) |
| O1 | H1b | O5              | 0.950(13) | 1.812(14) | 2.7494(11) | 168.4(18) |
| O2 | H2a | O3 <sup>2</sup> | 0.971(14) | 2.517(18) | 3.1423(11) | 122.1(14) |
| O2 | H2a | O9 <sup>3</sup> | 0.971(14) | 1.895(16) | 2.7855(10) | 151.3(17) |
| O2 | H2b | O5 <sup>4</sup> | 0.947(13) | 1.781(13) | 2.7271(11) | 176.2(17) |
| O3 | H3a | O7 <sup>5</sup> | 0.964(14) | 1.754(14) | 2.7017(11) | 166.7(17) |
| O3 | H3b | O8 <sup>6</sup> | 0.969(14) | 1.791(14) | 2.7424(11) | 166.5(18) |
| O4 | H4a | O7 <sup>7</sup> | 0.947(14) | 1.720(15) | 2.6653(11) | 175.7(19) |
| O4 | H4b | O8 <sup>5</sup> | 0.961(14) | 1.752(15) | 2.6930(10) | 166(2)    |
| O5 | H5a | O6 <sup>8</sup> | 0.964(15) | 1.810(15) | 2.7601(11) | 167.6(19) |
| O5 | H5b | O9 <sup>3</sup> | 0.963(15) | 2.015(16) | 2.9388(11) | 160.0(19) |

<sup>1</sup>-1+X,+Y,+Z; <sup>2</sup>+X,-1+Y,1+Z; <sup>3</sup>1-X,1-Y,1-Z; <sup>4</sup>1+X,+Y,+Z; <sup>5</sup>2-X,1-Y,-Z; <sup>6</sup>2-X,2-Y,-Z; <sup>7</sup>1-X,1-Y,-Z; <sup>8</sup>1-X,-Y,1-Z

**Table S30 Hydrogen Atom Coordinates (Å×10<sup>4</sup>) and Isotropic Displacement Parameters (Å<sup>2</sup>×10<sup>3</sup>) for CuSO<sub>4</sub>·5H<sub>2</sub>O, 4.**

| Atom | x        | y         | z         | U(eq) |
|------|----------|-----------|-----------|-------|
| H1a  | 2440(30) | 3950(30)  | 3592(16)  | 25(5) |
| H1b  | 2690(30) | 2210(30)  | 4859(17)  | 21(5) |
| H2a  | 5740(30) | 1980(30)  | 7042(15)  | 19(5) |
| H2b  | 8180(20) | 1610(30)  | 6241(17)  | 19(4) |
| H3a  | 9350(30) | 9050(30)  | -1040(18) | 24(5) |
| H3b  | 8450(30) | 11770(30) | -1221(18) | 27(5) |
| H4a  | 3890(30) | 6970(30)  | -984(19)  | 29(5) |
| H4b  | 6660(30) | 6480(30)  | -1170(20) | 29(5) |
| H5a  | 1690(40) | -1000(30) | 6280(20)  | 42(6) |
| H5b  | 2030(40) | 890(40)   | 6955(17)  | 31(6) |

**Refinement model description**

Number of restraints - 70, number of constraints - 0.

Details:

**1. Restrained distances**

O5-H5a = O5-H5b = O2-H2a = O2-H2b = O1-H1b = O1-H1a = O4-H4a = O4-H4b = O3-H3b = O3-H3a

0.989 with sigma of 0.02

**2. Uiso/Uanis restraints and constraints**

Uanis(H1a) ≈ Ueq, Uanis(H1b) ≈ Ueq, Uanis(H3a) ≈ Ueq, Uanis(H3b)

≈ Ueq, Uanis(H4a) ≈ Ueq, Uanis(H4b) ≈ Ueq, Uanis(H5a) ≈ Ueq,

Uanis(H5b) ≈ Ueq: with sigma of 0.01 and sigma for terminal atoms of 0.01

Uanis(H2a) ≈ Ueq, Uanis(H2b) ≈ Ueq: with sigma of 0.005 and sigma for terminal atoms of 0.005

**3. Rigid body (RIGU) restrains**

All non-hydrogen atoms

with sigma for 1-2 distances of 0.004 and sigma for 1-3 distances of 0.004

## 6. References for the Supporting Information

1. J. L. Jambor, D. K. Nordstrom, C. N. Alpers, *Rev. Mineral. Geochem.*, 2000, **40**, 303.
2. D. Götz, K. Heinzinger and A. Klemm, *Z. Naturforsch.*, 1975, **A30**, 1667-1674.
3. P. M. Gruzensky, *J. Res. Nat'l. Bur. Stand. A. Phys. Chem.*, 1964, **54A**, 313-315.
